# Supplementary material for: Aggregation-induced emission nanoparticles with NIR and photosensitizing characteristics for resistant bacteria elimination and real-time tracking
Source: Royal Society of Chemistry journal article supplement (doi:10.1039/d1qm00752a), 2021-01-01
Supplement: d1qm00752a1.pdf [file d1qm00752a1.pdf]

## Supporting Information

# Aggregation-Induced Emission Nanoparticles with NIR and Photosensitizing Characteristics for Resistant Bacteria Elimination and Real-time Tracking

Huanxiang Yuan,\* Zelin Li, Haotian Bai, Zhuo Chen, Chuang Yao, Shaochuan Jia, Li

Li, Ruilian Qi,\* Cui-Hua Zhao\*

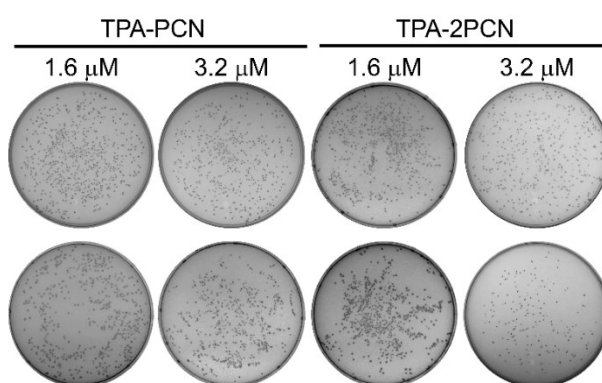

**Fig. S1** Plate photographs for *E. coli* on LB agar plate treated with AIE nanoparticles respectively in the concentrations of 1.6  $\mu\text{M}$  and 3.2  $\mu\text{M}$ , the first line is the dark group and the second line is the irradiation group.

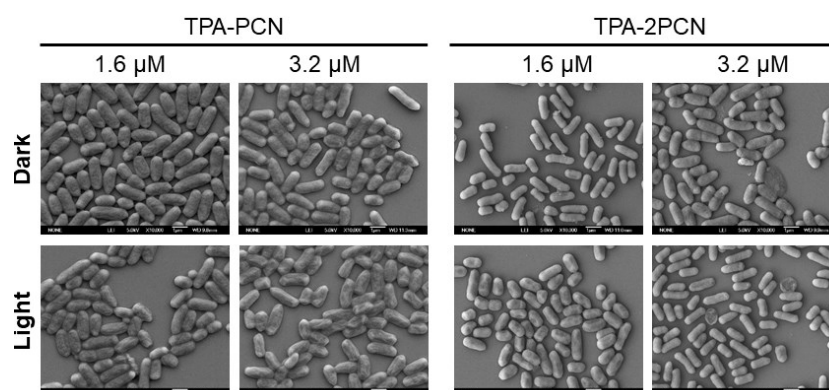

**Fig. S2** Morphology of *E. coli* treated with TPA-PCN and TPA-2PCN nanoparticles respectively in the concentrations of 1.6  $\mu\text{M}$  and 3.2  $\mu\text{M}$ . Scale bar is 1  $\mu\text{m}$ .

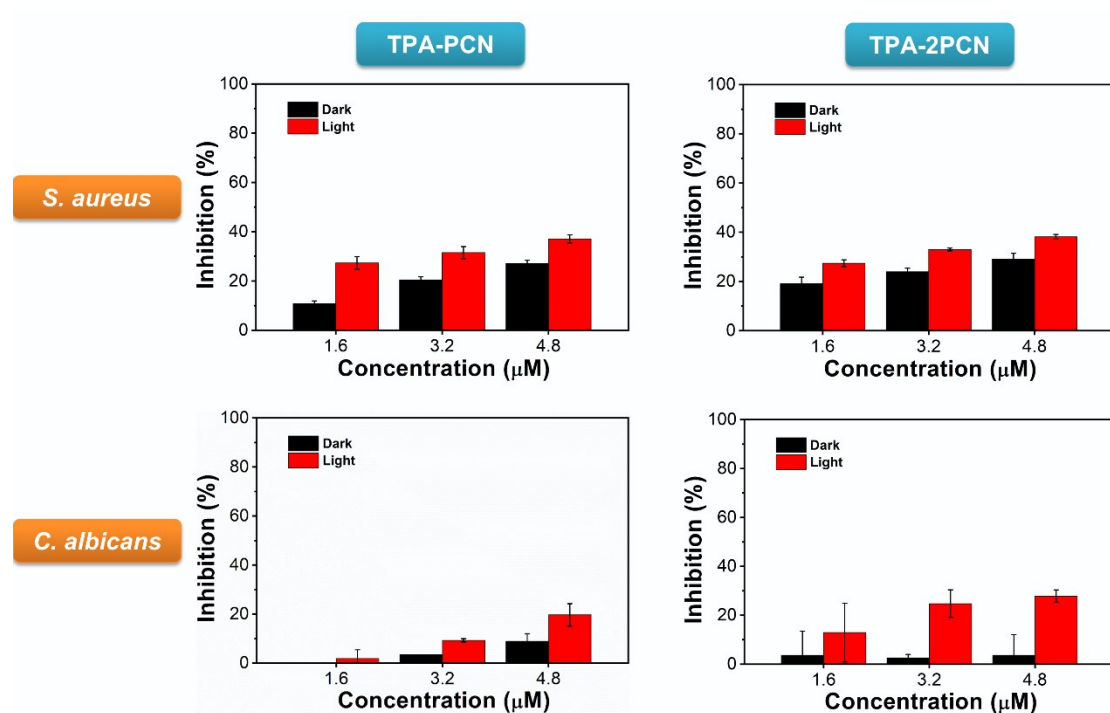

Fig. S3. The antibacterial activity of TPA-PCN and TPA-2PCN nanoparticles toward *S. aureus* and *C. albicans*.

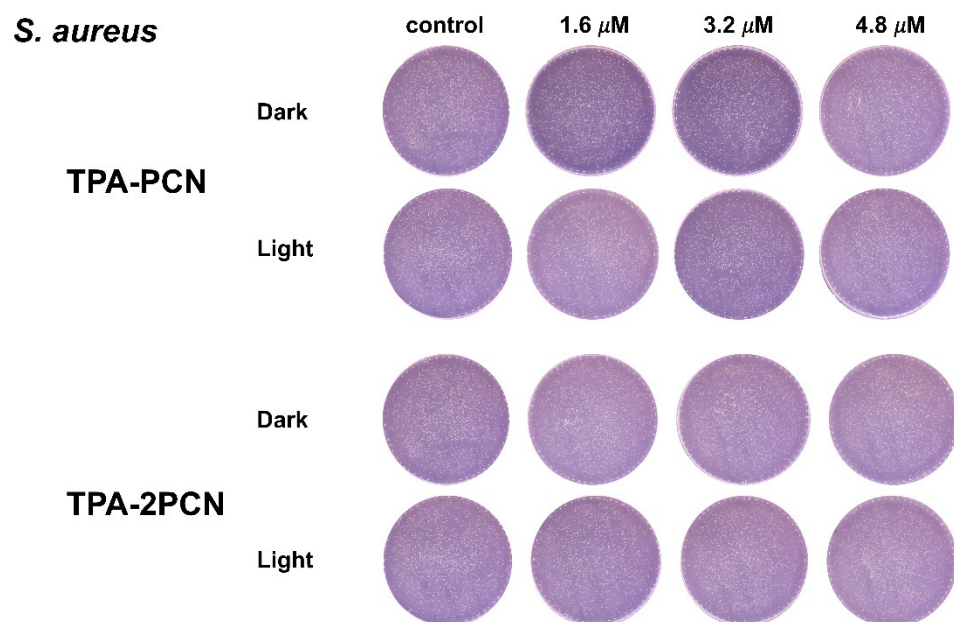

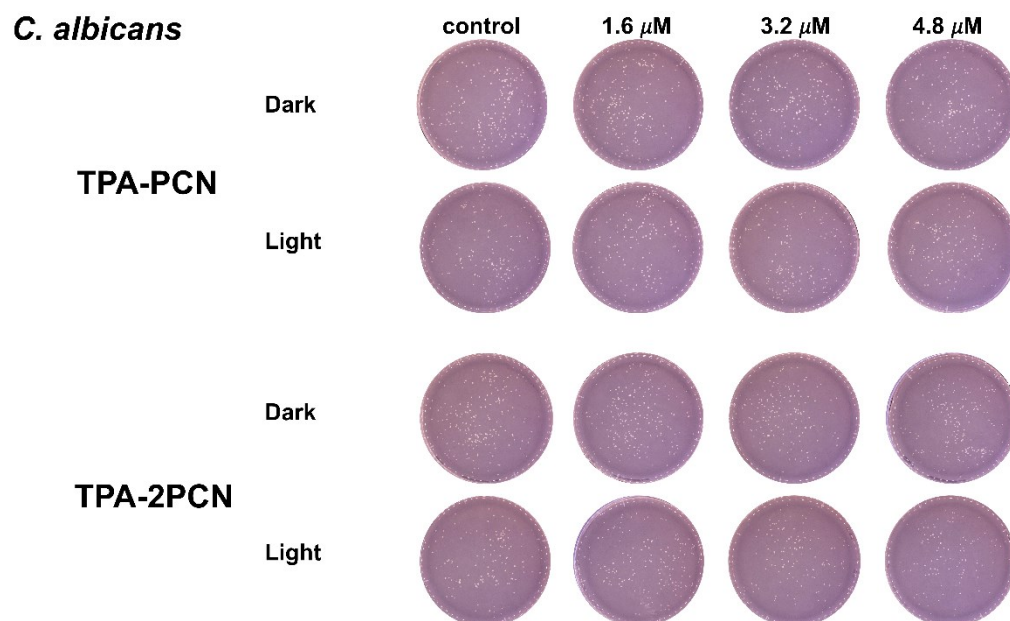

Fig. S4. The photographs of plate counting data of TPA-PCN and TPA-2PCN nanoparticles toward *S. aureus* and *C. albicans*.

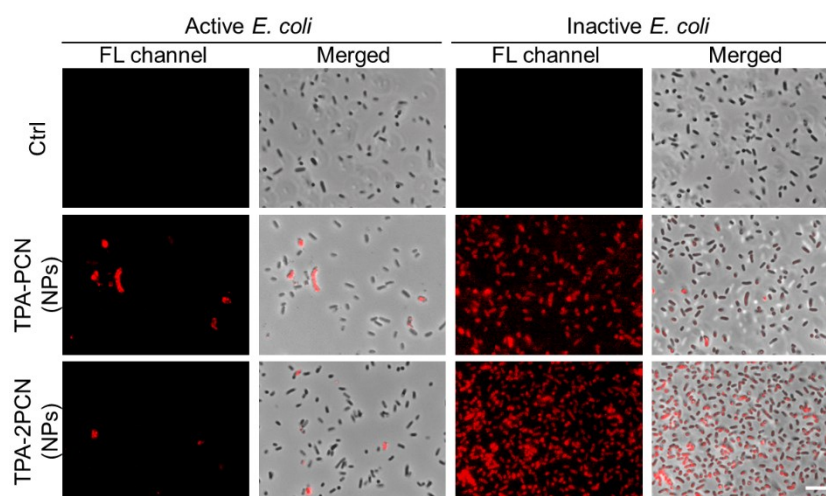

**Fig. S5** Fluorescence images of active and inactive *E. coli* treated with TPA-PCN and TPA-2PCN nanoparticles. The inactive *E. coli* was fixed with 0.1% glutaraldehyde, the red colour presented the fluorescent nanoparticles, and the scale bar is 10  $\mu$ m.

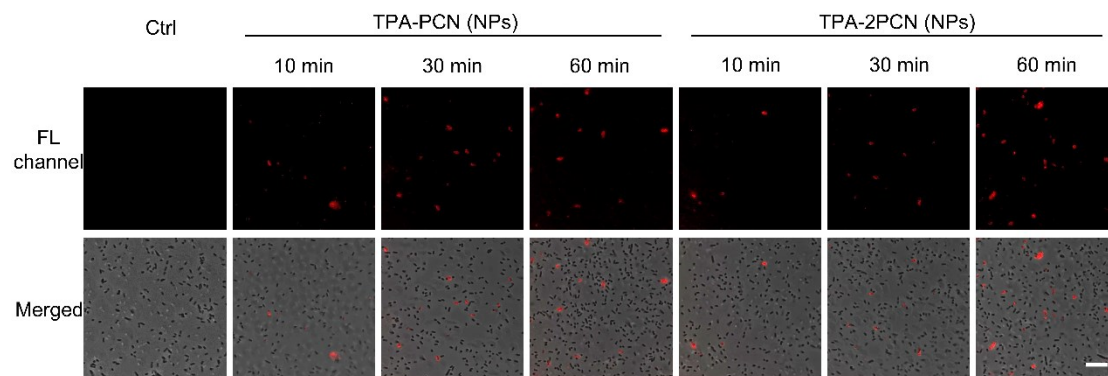

Fig. S6. Fluorescence images of active *E. coli* treated with TPA-PCN and TPA-2PCN nanoparticles for 10 min, 30 min, and 60 min respectively. The concentration of nanoparticles is 4.8  $\mu\text{M}$ . Scale bar is 10  $\mu\text{m}$ .

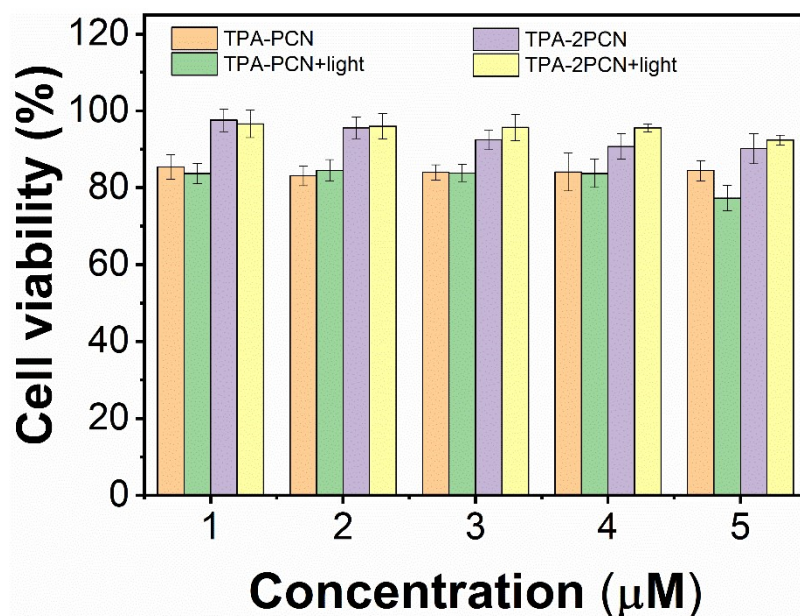

Figure S7. Cell viability of MCF-7 after incubation with TPA-PCN and TPA-2PCN nanoparticles respectively in the concentrations of 1  $\mu\text{M}$ , 2  $\mu\text{M}$ , 3  $\mu\text{M}$ , 4  $\mu\text{M}$  and 5  $\mu\text{M}$  in dark or under light irradiation.

As a promising photosensitizer, it is important to compare with the commercial photosensitizer. Therefore, protoporphyrin as a common commercial photosensitizer was selected to be a control group for the ROS generation detection of the three kinds of nanoparticles. The results are listed as follows, which shows that TPA-PCN exhibit much stronger ROS generation ability than commercial protoporphyrin, while TPA-

2PCN and protoporphyrin are roughly equal in ROS production ability, turning out the prospect of TPA-PCN nanoparticles as an alternative photosensitizer.

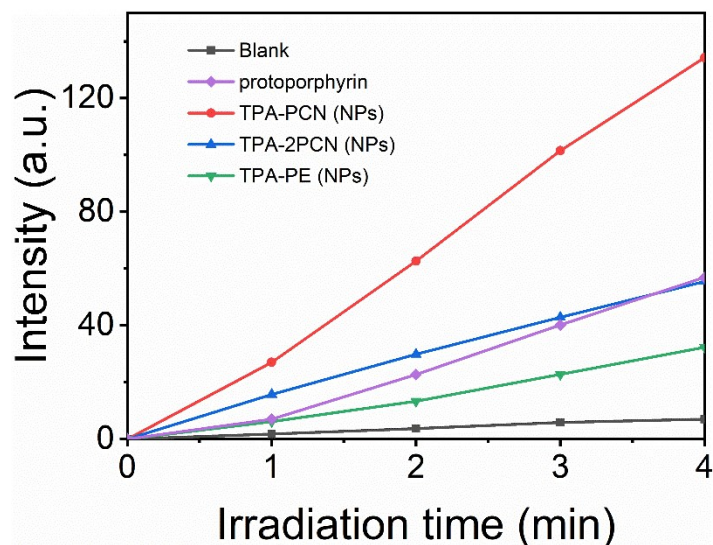

Fig. S8. Increasement of PL intensity of DCFH at 525 nm mixed/unmixed the three nanoparticles and protoporphyrin under white light irradiation.
